# Supplementary material for: MiR-290 Family Maintains Pluripotency and Self-Renewal by Regulating MAPK Signaling Pathway in Intermediate Pluripotent Stem Cells
Source: MDPI journal article supplement (doi:10.3390/ijms25052681), 2024-02-26
Supplement: s1 [file s1]

## Supplementary Materials

This supplementary materials file contains the following contents:

| Contents              | Details                          |
|-----------------------|----------------------------------|
| Supplementary Figures | Figure S1, S2, S3, S4, S5 and S6 |
| Supplementary Tables  | Table S1 and S2                  |

**Figure S1**

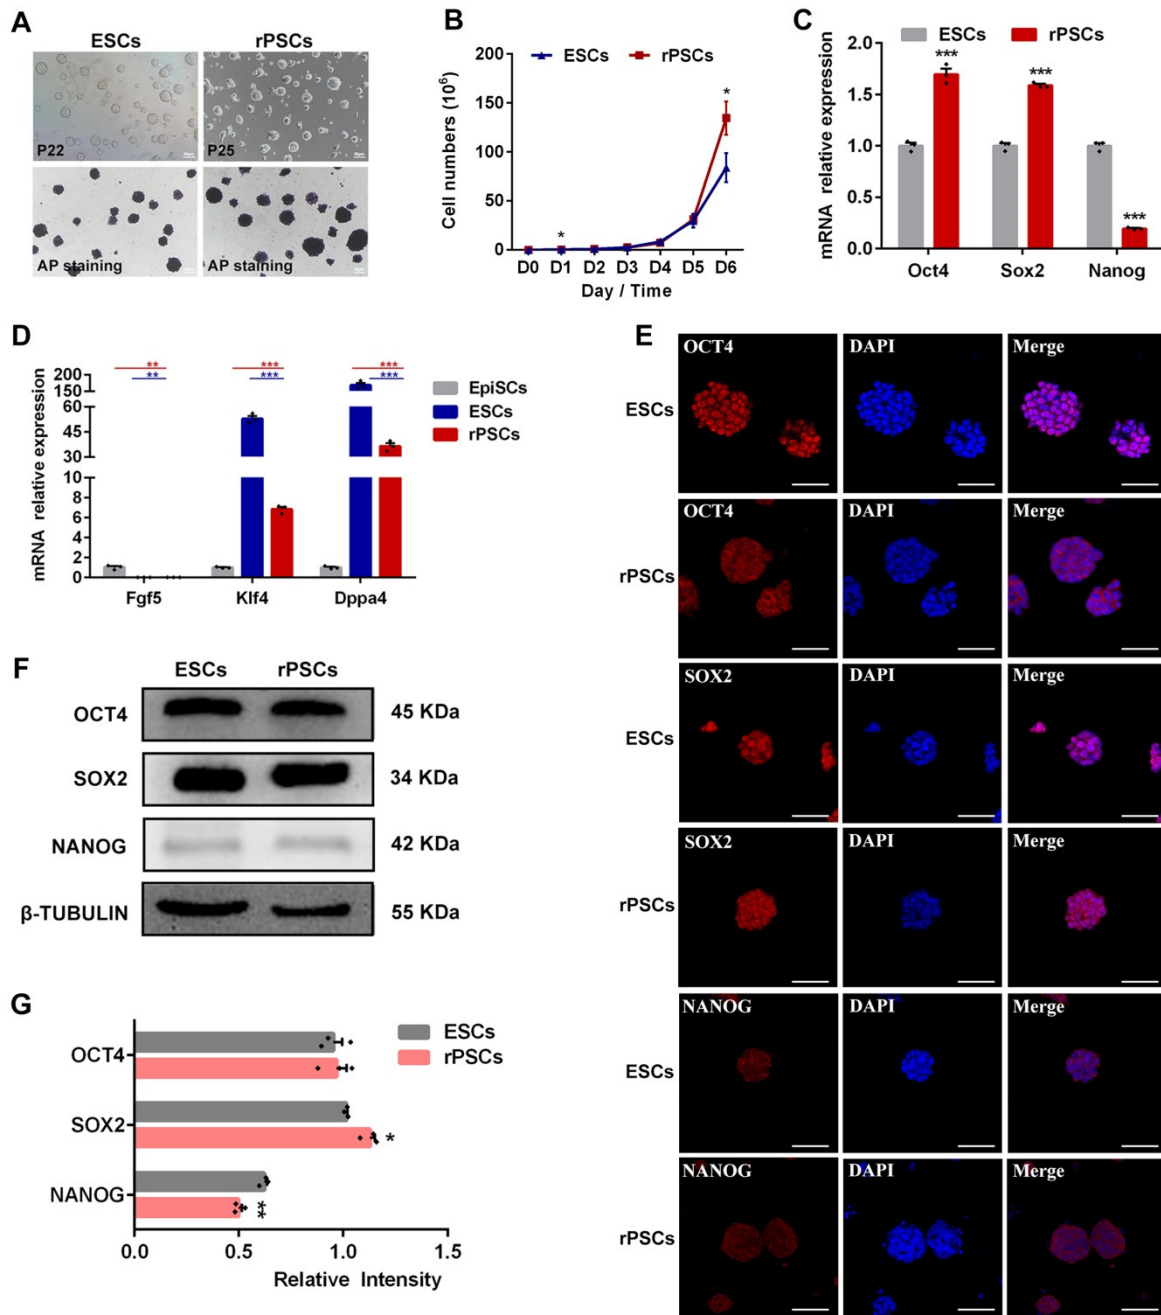

**Figure S1 Characterization of rPSCs.**

(A) AP staining on rPSCs and ESCs. Scale bars: 100  $\mu$ m. (B) Cell growth curve of rPSCs and ESCs. (C) Relative expression of *Oct4*, *Sox2*, and *Nanog* measured by RT-qPCR in rPSCs and ESCs. (D) Relative expression of *Fgf5*, *Klf4*, and *Dppa4* measured by RT-qPCR in rPSCs, ESCs, and EpiSCs. (E) Immunofluorescence staining of OCT4, SOX2, and NANOG in rPSCs and ESCs. Scale bars: 50  $\mu$ m. (F) Western blot analysis for OCT4, SOX2, and NANOG in rPSCs and ESCs. (G) Quantification of OCT4, SOX2, and NANOG protein intensity analysis in rPSCs and ESCs. The above experiments included three replicated. Error bars are SEM. Significance was tested with a two-tailed Student's *t*-tests, with \* $p < 0.05$ , \*\* $p < 0.01$ , \*\*\* $p < 0.001$ .

**Figure S2**

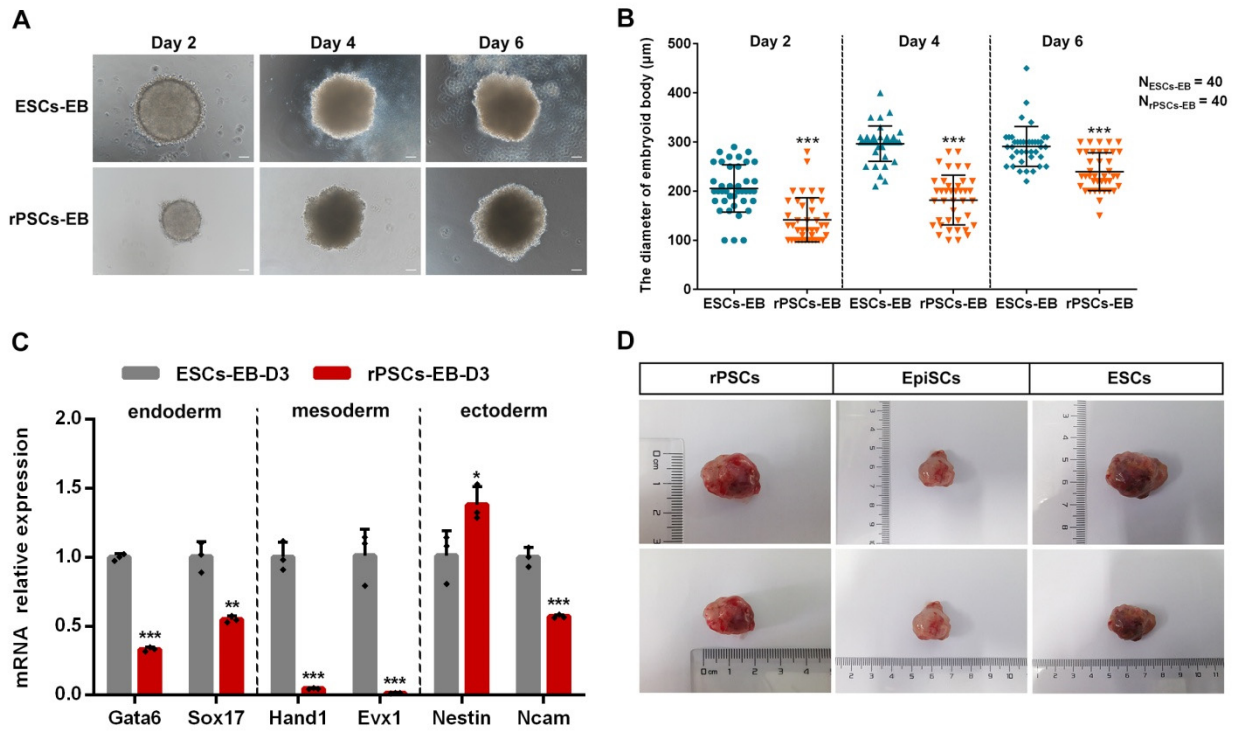

**Figure S2 Differentiation potential of rPSCs.**

(A) Morphology of embryoid body induction by rPSCs and ESCs in Day 2, Day 4, and Day 6. Scale bars: 100  $\mu\text{m}$ . (B) Statistics of the number and diameter of embryoid body formed by rPSCs and ESCs. N: represents the number of EB spheres. (C) RT-qPCR analysis of endoderm, mesoderm and ectoderm associated genes expression in the embryoid body of rPSCs and ESCs. (D) Teratoma morphology of rPSCs, ESCs, and EpiSCs. The above experiments included three replicated. Error bars are SEM. Significance was tested with a two-tailed Student's *t*-tests, with \* $p < 0.05$ , \*\* $p < 0.01$ , \*\*\* $p < 0.001$ .

**Figure S3**

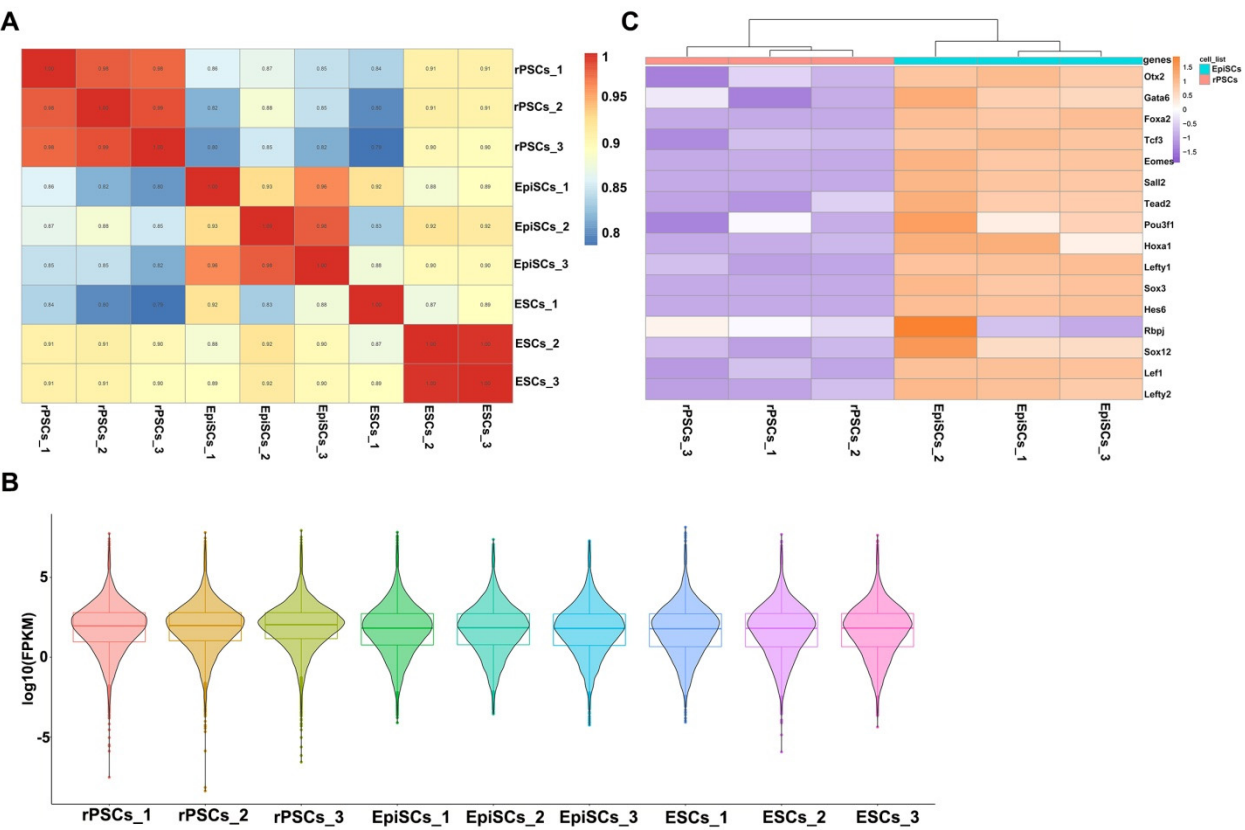

**Figure S3 Molecular features of rPSCs.**

**(A)** The correlation matrix of gene expression was clustered using Pearson correlation. **(B)** Violin plot showed the expressed genes in rPSCs, ESCs, and EpiSCs. **(C)** Heatmap showed primed pluripotent markers in rPSCs and EpiSCs based on RNA-seq data.

**Figure S4**

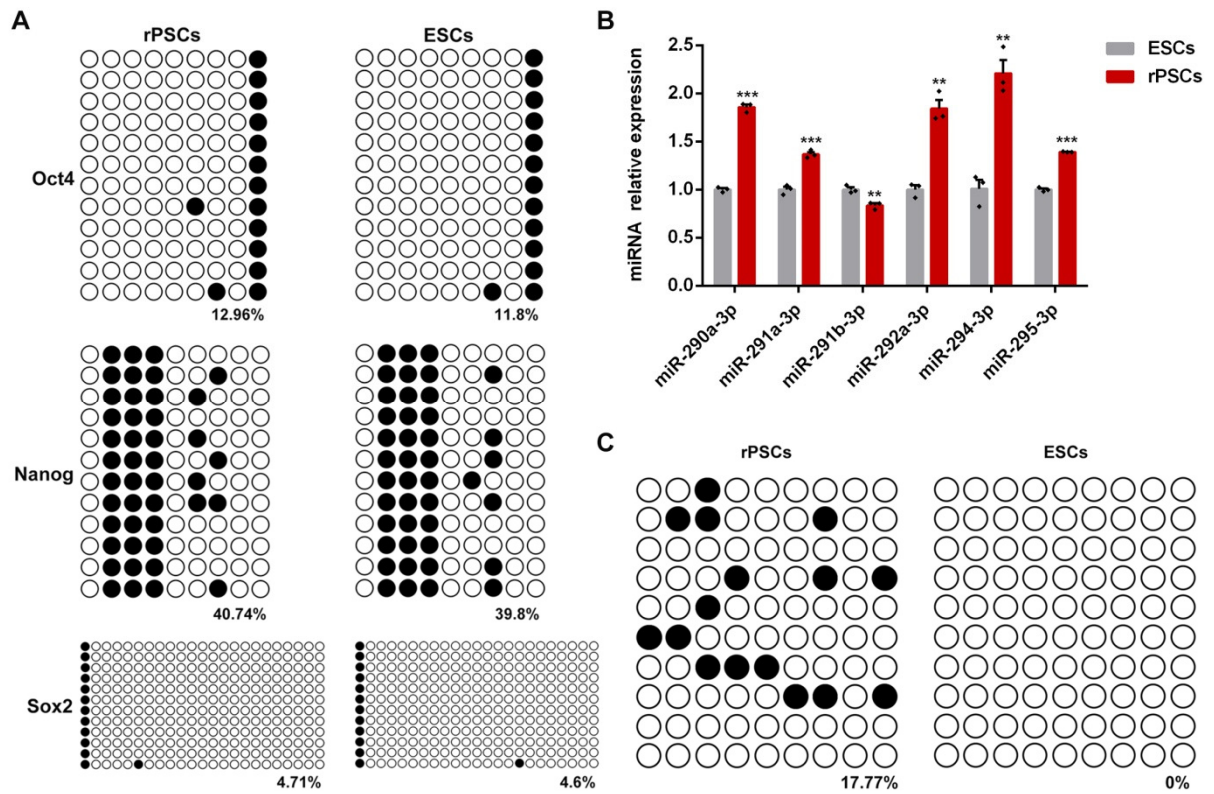

**Figure S4 Epigenetics changes during EpiSCs to rPSCs transition.**

(A) DNA methylation analysis of *Oct4*, *Sox2*, and *Nanog* promoter regions in rPSCs and ESCs. (B) RT-qPCR analysis of mature miRNAs *miR-290-3p*, *miR-291a-3p*, *miR-291b-3p*, *miR-292a-3p*, *miR-294-3p*, and *miR-295-3p* in rPSCs and ESCs. (C) DNA methylation analysis of miR-290 super enhancer (SE) region in rPSCs and ESCs. The above experiments included three replicated. Error bars are SEM. Significance was tested with a two-tailed Student's *t*-tests, with \*\* $p < 0.01$ , \*\*\* $p < 0.001$ .

**Figure S5**

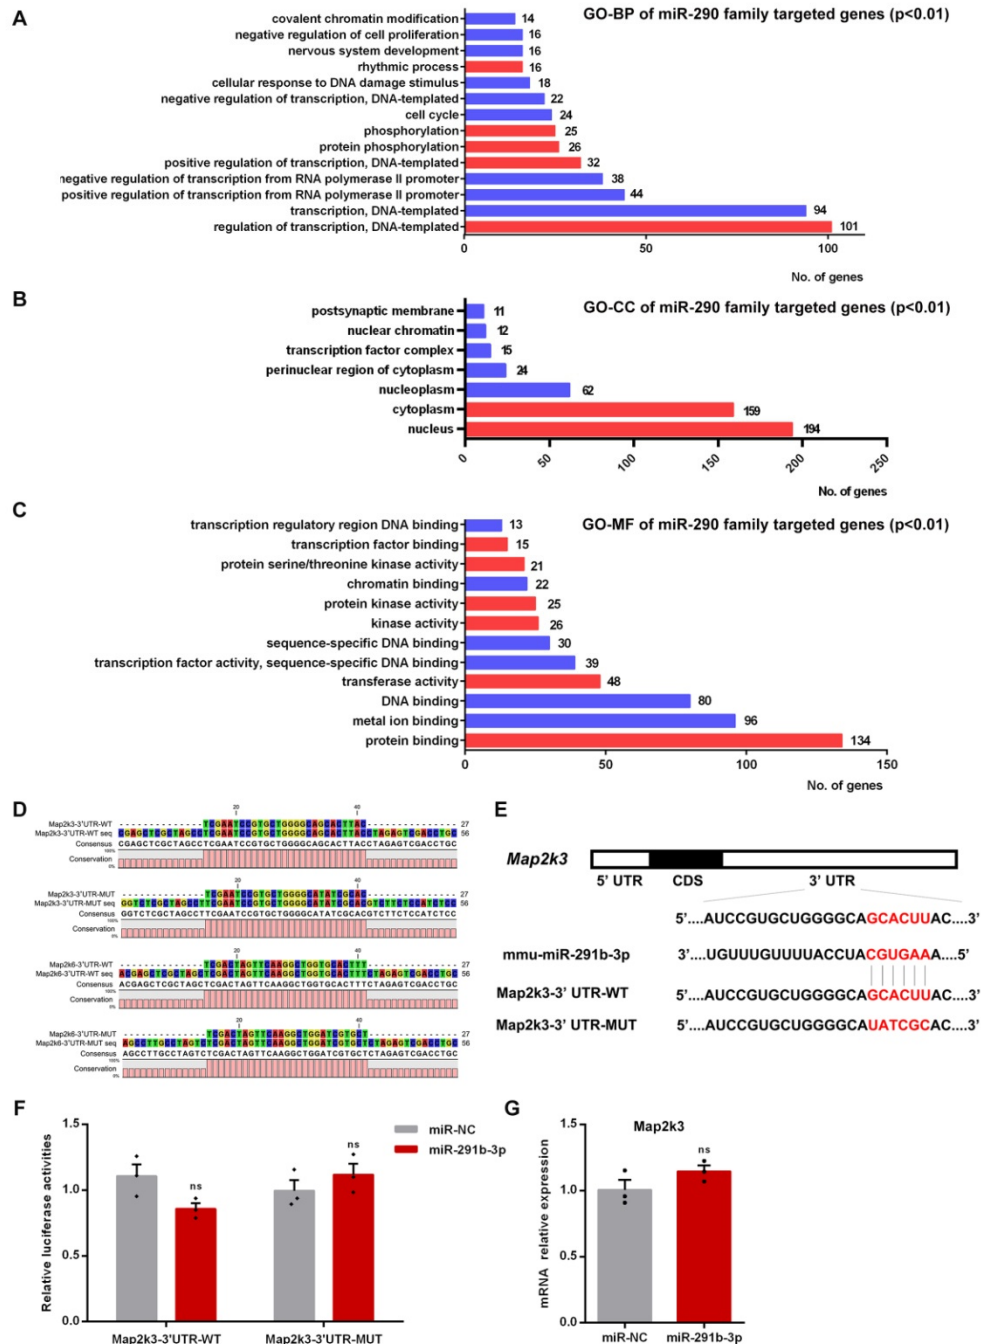

**Figure S5 Screening of candidate target genes of miR-291b-3p.**

(A-C) GO-BP, GO-MF, and GO-CC analyses of candidate genes. The above experiments included three replicated. (D) DNA sequence of Map2k3-3'UTR-WT, Map2k3-3'UTR-MUT, Map2k6-3'UTR-WT, and Map2k6-3'UTR-MUT cloned in pmiGLO vector was confirmed by sequencing. No mutation exists in sequence. (E) Target binding site of *miR-291b-3p* in the Map2k3 mRNA 3'-UTR. CDS, coding sequence; WT, wild-type seed sequence; MUT, mutant seed sequence. (F) Relative luciferase activity in ESCs co-transfected with *miR-291b-3p* mimic and Map2k3-3'UTR-WT or Map2k3-3'UTR-MUT luciferase reporter vector. Each experiment included  $1 \times 10^6$  cells. (G) RT-qPCR analysis the expression levels of *Map2k3* in ESCs after *miR-291b-3p* mimic transfection. Error bars are SEM. Significance was tested with a two-tailed Student's *t*-tests, ns at  $p > 0.05$ .



**Figure S6**

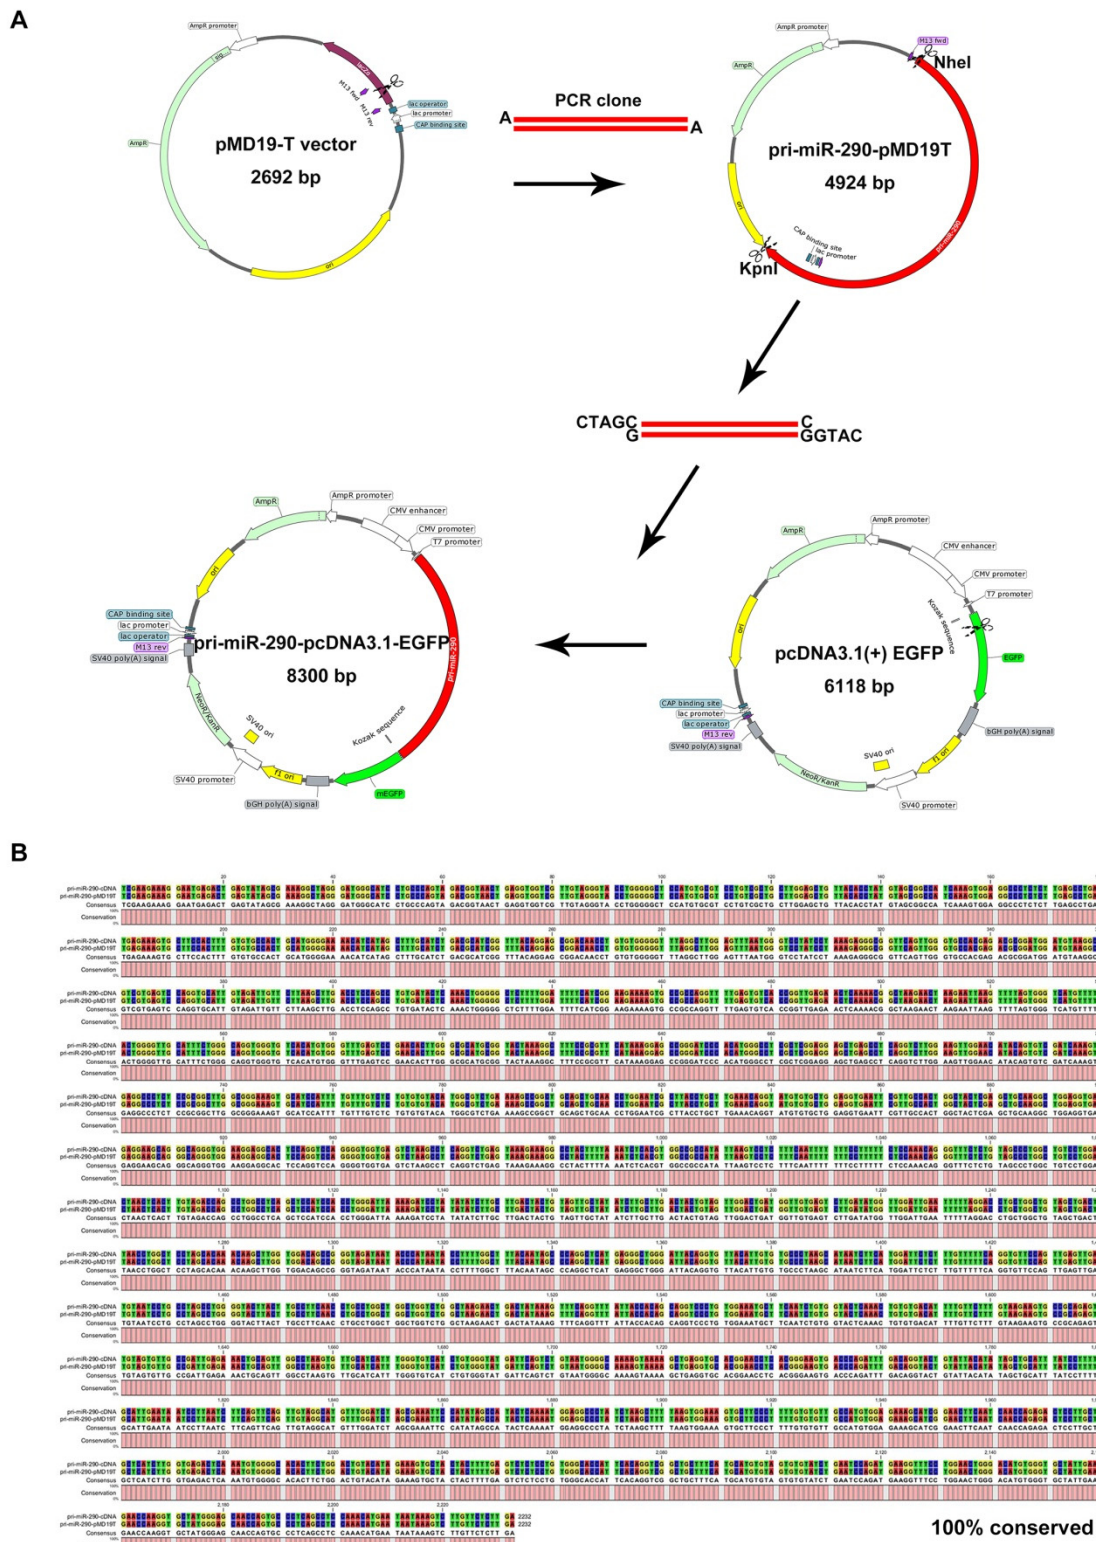

**Figure S6 pri-miR-290-pcDNA3.1-EGFP overexpression vector construction.**

(A) Schematic representation of pri-miR-290-pcDNA3.1-EGFP plasmid. (B) DNA sequence of pri-miR-290 cDNA confirmed by sequencing. No mutation existing in pri-miR-290 cDNA sequence.

## Supplementary Material

**Table S1 Antibody list**

| <b>Antibodies</b>                        | <b>Source</b>  | <b>Identifier</b>  |
|------------------------------------------|----------------|--------------------|
| Rabbit polyclonal anti-OCT4              | Abcam          | Cat No: ab19857    |
| Mouse monoclonal anti-SOX2               | Abcam          | Cat No: ab79351    |
| Rabbit polyclonal anti-NANOG             | Proteintech    | Cat No: 14295-1-AP |
| Rabbit polyclonal anti-AFP               | Proteintech    | Cat No: 14550-1-AP |
| Rabbit polyclonal anti-SMA               | Proteintech    | Cat No: 14395-1-AP |
| Rabbit polyclonal anti-GFAP              | Proteintech    | Cat No: 16825-1-AP |
| Rabbit polyclonal anti-GATA6             | Cell signaling | Cat No: 5851       |
| Goat polyclonal anti-T                   | Snata Cruz     | Cat No: sc17743    |
| Goat polyclonal anti-NESTIN              | Snata Cruz     | Cat No: sc21247    |
| Rabbit polyclonal anti-H3K27me3          | Abcam          | Cat No: ab192985   |
| Rabbit polyclonal anti-H3K4me3           | Abcam          | Cat No: ab8580     |
| Rabbit polyclonal anti-H3K9me3           | Abcam          | Cat No: ab8898     |
| Rabbit polyclonal anti-MAP2K6            | Proteintech    | Cat No: 12745-1-AP |
| Rabbit polyclonal anti-p38 MAPK          | Proteintech    | Cat No: 14064-1-AP |
| Rabbit polyclonal anti-Phospho-p38 MAPK  | Proteintech    | Cat No: 28796-1-AP |
| Rabbit polyclonal anti-ERK1/2            | Proteintech    | Cat No: 11257-1-AP |
| Rabbit polyclonal anti-Phospho-ERK1/2    | Proteintech    | Cat No: 28733-1-AP |
| Rabbit polyclonal anti- $\beta$ -TUBULIN | Abcam          | Cat No: ab15568    |



**Supplementary Material****Table S2 Primer sequences**

| RT-qPCR primers |                                    |
|-----------------|------------------------------------|
| Gene name       | Sequences                          |
| GAPDH           | Forward: AAAATGGTGAAGGTCGGTGTG     |
|                 | Reverse: AATGAAGGGGTCGTTGATGC      |
| Oct4            | Forward: CTGAGGGCCAGGCAGGAGCACGAG  |
|                 | Reverse: CTGTAGGGAGGGCTTCGGGCACTT  |
| Sox2            | Forward: GGCAGCTACAGCATGATGCAGGAGC |
|                 | Reverse: CTGGTCATGGATTGTACTGCAGG   |
| Nanog           | Forward: CAGGTGTTTGAGGGTAGCTC      |
|                 | Reverse: CGGTTCATCATGGTACAGTC      |
| Gata6           | Forward: TGCTGGAAATTGCAACAAACC     |
|                 | Reverse: GTCACGTGGTACAGGCGTCA      |
| Sox17           | Forward: GTCAACGCCTTCCAAGACTTG     |
|                 | Reverse: GTAAAGGTGAAAGGCGAGGTG     |
| Gata4           | Forward: CCCTACCCAGCCTACATGG       |
|                 | Reverse: ACATATCGAGATTGGGGTGTCT    |
| T               | Forward: GCTTCAAGGAGCTAACTAACGAG   |
|                 | Reverse: CCAGCAAGAAAGAGTACATGGC    |
| Hand1           | Forward: CTACCAGTTACATCGCCTACTTG   |
|                 | Reverse: ACCACCATCCGTCTTTTTGAG     |
| Evx1            | Forward: GAGAGCCGAAAGGACATGGTT     |
|                 | Reverse: CTGCCTGCTAGTCCATCGAC      |
| Flk1            | Forward: TTTGGCAAATACAACCCTTCAGA   |
|                 | Reverse: GCTCCAGTATCATTTCCAACCA    |
| Nestin          | Forward: CCACAGTGCCCAGTTCTACTG     |
|                 | Reverse: TAAAATAGAGTGGTGAGGGTTGA   |
| K8              | Forward: TCCATCAGGGTGACTCAGAAA     |

|        |                                  |
|--------|----------------------------------|
|        | Reverse: TTCACCGTGACGGCTGTG      |
| Pax6   | Forward: TACCAGTGTCTACCAGCCAAT   |
|        | Reverse: TGCACGAGTATGAGGAGGTCT   |
| Ncam   | Forward: GGGGAGGATGCTGTGATTGTC   |
|        | Reverse: GCGGTAAGTACCCTCATCTGT   |
| Fgf5   | Forward: AAGTAGCGCGACGTTTTCTTC   |
|        | Reverse: CTGGAAACTGCTATGTTCCGAG  |
| Klf4   | Forward: GTGCCCCGACTAACCGTTG     |
|        | Reverse: GTCGTTGAACTCCTCGGTCT    |
| Dppa4  | Forward: TCCTGCAAAGGCTAAAGCAACG  |
|        | Reverse: TCCTGGCGTCTCAGTGTCTTG   |
| Dnmt1  | Forward: AAGAATGGTGTGTCTACCGAC   |
|        | Reverse: CATCCAGGTTGCTCCCCTTG    |
| Dnmt3a | Forward: ATGTGGTTCGGAGATGGCAAG   |
|        | Reverse: AGATGGCTTTGCGGTACATGG   |
| Dnmt3b | Forward: CGTTAATGGGAACTTCAGTGACC |
|        | Reverse: CTGCGTGTAATTCAGAAGGCT   |
| Dnmt3l | Forward: GCTCTAAGACCCTTGAAACCTTG |
|        | Reverse: GTCGGTTCACCTTGACTTCGTA  |
| Tet1   | Forward: ACACAGTGGTGCTAATGCAG    |
|        | Reverse: AGCATGAACGGGAGAATCGG    |
| Tet2   | Forward: AGAGAAGACAATCGAGAAGTCGG |
|        | Reverse: CCTTCCGTACTCCCAAACATCAT |
| Ezh1   | Forward: CCAGACTGCCAGAATCGCTTT   |
|        | Reverse: CAGGTGCTTTTTGAGGCCA     |
| Ezh2   | Forward: AGTGACTTGGATTTTCCAGCAC  |
|        | Reverse: AATTCTGTTGTAAGGGCGACC   |
| Wdr5   | Forward: TTTGAAGATTTGGGACGTGAGTT |
|        | Reverse: ATGGGCAGGCAAAGTCTTGAG   |

|        |                                      |
|--------|--------------------------------------|
| Braf   | Forward: CAATTGAGCCTGTGAATATCGATGAA  |
|        | Reverse: TATTTCCGAAGACAGCGCATCAG     |
| Chuk   | Forward: AGCATTCAGCTTGACTTGGAGAGATA  |
|        | Reverse: ATGACACCAACCTCAGAATAGTGAATG |
| Stk3   | Forward: TGGATGGCTCCTGAGGTAATTCA     |
|        | Reverse: CTGAATGTTGGTGGTGGGTTTGTA    |
| Map3k3 | Forward: TTCGGTGTGAGTCCTGTCTTACCA    |
|        | Reverse: GAACAGCATAAGAGTGACTCCAACCTG |
| Dusp9  | Forward: AGAGTCTGAGTCGGTCATGC        |
|        | Reverse: ACTGCTACCCTGGTCGTACA        |
| Mk3    | Forward: ATGACAAGTCCTGTGATATGTGGTCC  |
|        | Reverse: ACCATTCAGGGTTAGGGAAGCTATAC  |
| Atf3   | Forward: TTGAGGATTTTGCTAACCTGACACC   |
|        | Reverse: TTGTTGACGGTAACTGACTCCAGC    |
| Fzd4   | Forward: TCGGCTACAACGTGACCAAGATG     |
|        | Reverse: CTGGAGCAGCCGTACTGGATGA      |
| Hey1   | Forward: GACGAGACCGAATCAATAACAGTTTG  |
|        | Reverse: CAGGTGATCCACAGTCATCTGCA     |
| Atm    | Forward: AACTTTGGTTTACTTGAGGCCATCA   |
|        | Reverse: AGGACTAGAAGGTTTACAGGCTGAGC  |
| Mertk  | Forward: CAGGGCCTTTACCAGGGAGACT      |
|        | Reverse: GCTGTGTGTGCTGGATGTGATCTT    |
| Sox13  | Forward: GATGCCACCAACGCTAAAGCTC      |
|        | Reverse: CTGTAAGTTGCGGTTGAAGTCCAG    |
| Stag2  | Forward: CCTACAAGCATGACCGGGACATA     |
|        | Reverse: ATGTCTGAACATCTCTGCTGTGACG   |
| Map2k3 | Forward: GCCTCAGACCAAAGGAAAATCC      |
|        | Reverse: GGTGTGGGGTTGGACACAG         |
| Map2k6 | Forward: ATGTCTCAGTCGAAAGGCAAG       |

|                                |                                             |
|--------------------------------|---------------------------------------------|
|                                | Reverse: TTGGAGTCTAAATCCCGAGGC              |
| pri-miR-290                    | Forward: TCGAAGAAAGGAATGAGACTGAGTA          |
|                                | Reverse: TCAAGAGAACAAGACTTTATTATTC          |
| <b>miRNA RT-qPCR primers</b>   |                                             |
| <b>Gene name</b>               | <b>Sequences</b>                            |
| U6                             | Forward: TGGAACGCTTCACGAATTTGCG             |
|                                | Reverse: GGAACGATACAGAGAAGATTAGC            |
| miR-290a-3p                    | Forward: AAAGTGCCGCCTAGTTTAAAGCCC           |
| miR-291a-3p                    | Forward: AAAGTGCTTCCACTTTGTGTGC             |
| miR-291b-3p                    | Forward: AAAGTGCATCCATTTTGTGTTGT            |
| miR-292a-3p                    | Forward: CAAAGTGCCGCCAGGTT                  |
| miR-294-3p                     | Forward: CGAAAGTGCTTCCCTTTTGT               |
| miR-295-3p                     | Forward: AAAGTGCTACTACTTTTGAGTCT            |
| <b>Gene clone primers</b>      |                                             |
| <b>Gene name</b>               | <b>Sequences</b>                            |
| pri-miR-290 cDNA               | Forward: AAAGAGCTCTCGAAGAAAGGAATGAGACTGAGTA |
|                                | Reverse: AAACCGCGGTCAAGAGAACAAGACTTTATTATTC |
| <b>DNA methylation primers</b> |                                             |
| <b>Gene name</b>               | <b>Sequences</b>                            |
| BS-Oct4                        | Forward: GTTTTGGATATGGGTTGAAATATTG          |
|                                | Reverse: CCCACCTAATAAAAAATAAAAAAAC          |
| BS-Sox2                        | Forward: GGGTTTTGTTTTATTTTGGTTTTAGTTT       |
|                                | Reverse: TCTCTTCTCTACCTTAACAACCTCCTAAT      |
| BS-Nanog                       | Forward: TAGGATATAGGTTTTTTTTTTTAGATTTG      |
|                                | Reverse: AAAACAAAACACCAACCAAATCAAATA        |
| BS-pri-miR-290 SE              | Forward: AGATGGTAAGTATATGTTTGGGGG           |
|                                | Reverse: TAATCTCACTATATAAACCTAACCTACC       |
| <b>miRNA mimics sequences</b>  |                                             |

| Gene name                         | Sequences                            |
|-----------------------------------|--------------------------------------|
| miR-291b-3p                       | AAAGUGCAUCCAUUUUGUUUGU               |
| <b>Luciferase reporter assays</b> |                                      |
| Gene name                         | Sequences                            |
| Map2k3-3'UTR-WT                   | Forward: TCGAATCCGTGCTGGGGCAGCACTTAC |
|                                   | Reverse: CTAGGTAAGTGCTGCCCCAGCACGGAT |
| Map2k3-3'UTR-MUT                  | Forward: TCGAATCCGTGCTGGGGCATATCGCAC |
|                                   | Reverse: CTAGGTGCGATATGCCCCAGCACGGAT |
| Map2k6-3'UTR-WT                   | Forward: TCGACTAGTTCAAGGCTGGTGCACTTT |
|                                   | Reverse: CTAGAAAGTGCACCAGCCTTGAACTAG |
| Map2k6-3'UTR-MUT                  | Forward: TCGACTAGTTCAAGGCTGGATCGTGCT |
|                                   | Reverse: CTAGAGCACGATCCAGCCTTGAACTAG |
